# Supplementary material for: Analysis of Compositional Bias in a Commercial Phage Display Peptide Library by Next-Generation Sequencing
Source: Viruses. 2022 Oct 29;14(11):2402. doi: 10.3390/v14112402 (PMC9697088; doi:10.3390/v14112402)
Supplement: Supplementary file 1 [file viruses-14-02402-s001.zip › viruses-1971227-supplementary.pdf]

## Supplementary Materials

**Table S1: Literature search revealing the identification of AETVESCLAKSH in phage display experiments**

Summary of the literature search for the identification of AETVESCLAKSH in phage display experiments. Database, phage display library, peptide sequence, sequencing method, if the peptide has a reported function, which binding assays were performed using the clone/peptide, and the reference for each paper are listed. Differences in peptide sequence compared to the AETVESCLAKSH sequence are marked in bold. Abbreviations: BDB: Biopanning Data Base, ELISA: enzyme-linked immunosorbent assay, FRET: Fluorescence Resonance Energy Transfer, WT: wild-type, SPR: Surface Plasmon Resonance.

| Database used  | Phage display library | Peptide sequence    | Sequencing method | Reported function                | Target                                  | Assays                                          | Reference |
|----------------|-----------------------|---------------------|-------------------|----------------------------------|-----------------------------------------|-------------------------------------------------|-----------|
| BDB            | Ph.D.-12              | AETVESCLAKSH        | Sanger            | Yes                              | IgE of melon-allergic patients          | ELISA                                           | [20]      |
| BDB            | Ph.D.-12              | AETVESCLAKSH        | Sanger            | Yes (part of consensus sequence) | Bacillus cereus 4342                    | ELISA, Dot-blot assay, Qdot, Coomassie staining | [21]      |
| BDB            | Ph.D.-C7C             | AETVESCLAKSH        | Sanger            | No                               | Type IV secretion system protein VirB8  | FRET                                            | [22]      |
| BDB            | Ph.D.-12              | AETVESCLAKSH        | Sanger            | No, identified as WT             | Gamma-irradiated Salmonella spp.        | None                                            | [23]      |
| Google Scholar | Ph.D.-12              | AETVESCLAKSH        | Sanger            | No                               | TiO <sub>2</sub> nanoparticles          | FRET                                            | [24]      |
| Google Scholar | Ph.D.-12              | AETVESCLAKSH        | Sanger            | Yes                              | CD40 extracellular domain               | SPR                                             | [18]      |
| Google Scholar | Ph.D.-12              | AETVESCLAKSH        | Sanger            | No                               | γδ TCR                                  | None                                            | [25]      |
| MimoBlast      | Ph.D.-12              | AETVESCLAKPH        | Sanger            | No                               | PL9-11 panel of IgG anti-DNA antibodies | None                                            | [26]      |
| MimoBlast      | Ph.D.-12              | <b>FRSFESCLAKSH</b> | Sanger            | Yes                              | Human IL-10 R α protein                 | ELISA, SPR                                      | [19]      |
| MimoBlast      | Ph.D.-7               | AETVESC             | Sanger            | No                               | IgE from Ara h 1 serum                  | None                                            | [27]      |
| MimoBlast      | Ph.D.-7               | AETVESC             | Sanger            | No                               | Murine digestive tract                  | None                                            | [28]      |

**Table S2: Global frequencies – the expected and observed frequencies by NEB and our in-house analysis**

The global frequency of each amino acid in the naïve Ph.D.<sup>TM</sup>-12 library is indicated in the table. The expected frequency of each amino acid was calculated by the available number of codons. The observed frequency reported by NEB, as well as the in-house observed frequency is shown.

| Amino acid    | Code | Expected frequency | Observed frequency (NEB) | Observed freq (in-house) |
|---------------|------|--------------------|--------------------------|--------------------------|
| Arginine      | R    | 9.4                | 5.7                      | 5.6                      |
| Leucine       | L    | 9.4                | 8.9                      | 8.6                      |
| Serine        | S    | 9.4                | 11.2                     | 11.0                     |
| Alanine       | A    | 6.2                | 7.4                      | 6.8                      |
| Glycine       | G    | 6.2                | 5.8                      | 6.2                      |
| Proline       | P    | 6.2                | 8.1                      | 7.3                      |
| Threonine     | T    | 6.2                | 7.8                      | 7.5                      |
| Glutamine     | Q    | 6.2                | 3.9                      | 2.9                      |
| Valine        | V    | 6.2                | 6.1                      | 6.3                      |
| Asparagine    | N    | 3.1                | 4.5                      | 4.8                      |
| Aspartic acid | D    | 3.1                | 4.6                      | 4.9                      |

|               |   |     |     |     |
|---------------|---|-----|-----|-----|
| Cysteine      | C | 3.1 | 1.5 | 1.7 |
| Glutamic acid | E | 3.1 | 3.1 | 3.1 |
| Histidine     | H | 3.1 | 4.6 | 4.2 |
| Isoleucine    | I | 3.1 | 3.4 | 3.7 |
| Lysine        | K | 3.1 | 2.3 | 2.5 |
| Methionine    | M | 3.1 | 3.1 | 3.1 |
| Phenylalanine | F | 3.1 | 2.7 | 3.5 |
| Tryptophan    | W | 3.1 | 2.3 | 2.4 |
| Tyrosine      | Y | 3.1 | 3.6 | 4.0 |

### Simulated naïve library displays no clustering

To investigate the appearance of a truly random library, a naïve library was simulated using the same number of input sequences. Figure S1 shows PCA plot and heatmap of the simulated data set, where only one cluster is formed. The heatmap shows small differences for each amino acid at every position, when comparing the observed frequency to the expected frequency.

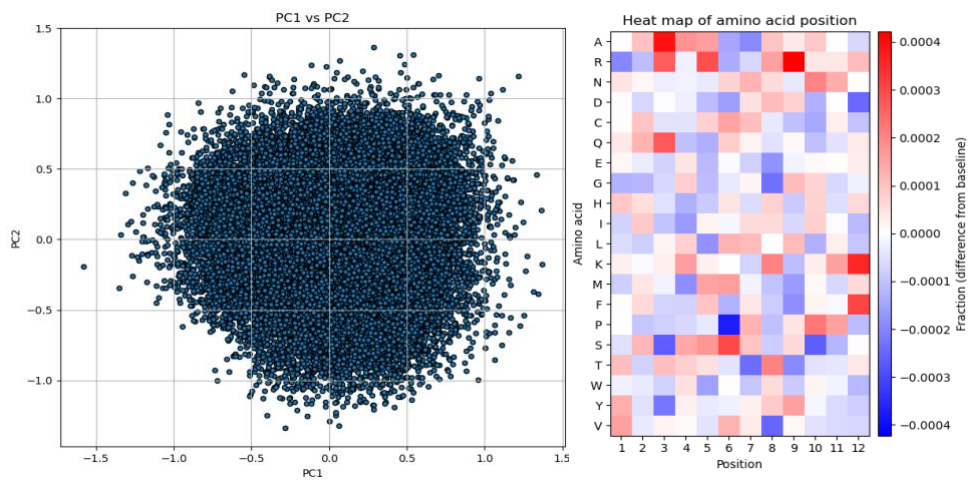

**Figure S1: Simulation of a naïve peptide phage display library**

A simulation of a naïve library with the same number of reads (6,940,916) was performed. Principal component analysis (PCA) was conducted and a heatmap of the expected positional frequencies were made. The amino acids are incorporated according to the NNK strategy.
